# Supplementary material for: Quantitative analysis of the secretion of the MCP family of chemokines by muscle cells
Source: Royal Society of Chemistry journal article supplement (doi:10.1039/c0mb00209g), 2010-12-08
Supplement: c0mb00209g.pdf [file c0mb00209g.pdf]

## Quantitative analysis of the secretion of the MCP family of chemokines by muscle cells: Supplementary information

Jeanette Henningsen, Bente Klarlund Pedersen and Irina Kratchmarova

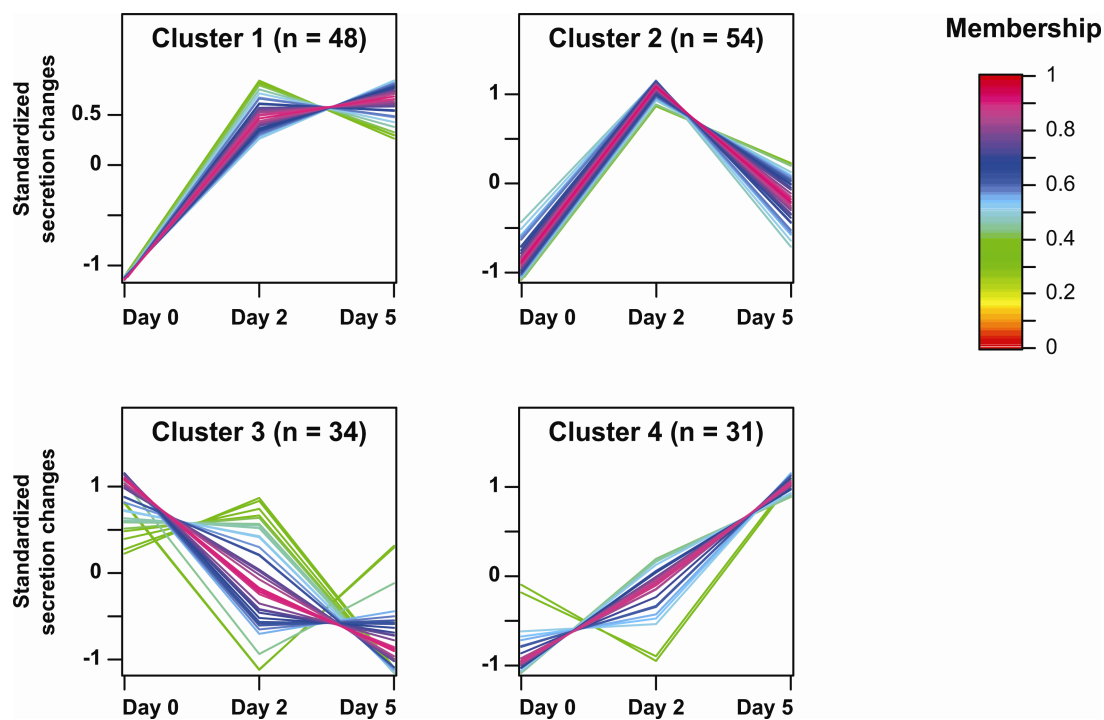

Fig. S1
